# Supplementary material for: Expression of HLA-DR in Cytotoxic T Lymphocytes: A Validated Predictive Biomarker and a Potential Therapeutic Strategy in Breast Cancer
Source: MDPI journal article supplement (doi:10.3390/cancers13153841), 2021-07-30
Supplement: s1 [file s1]

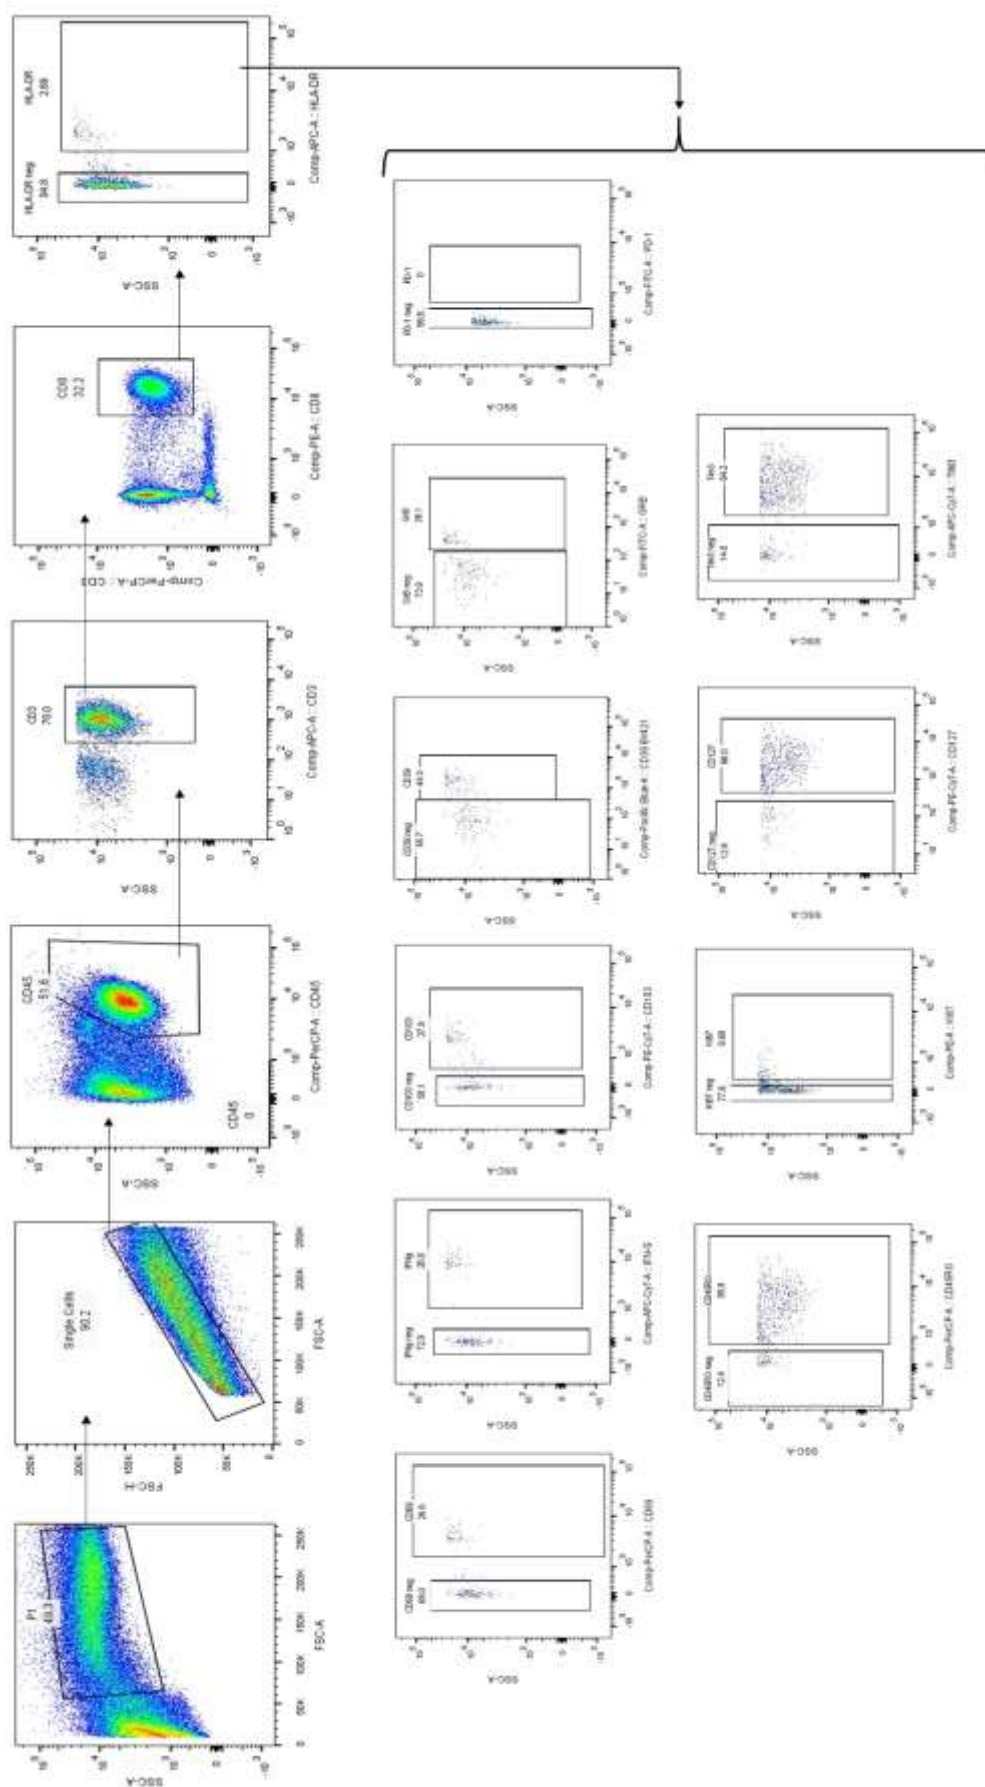

Figure S1. Gating strategy.

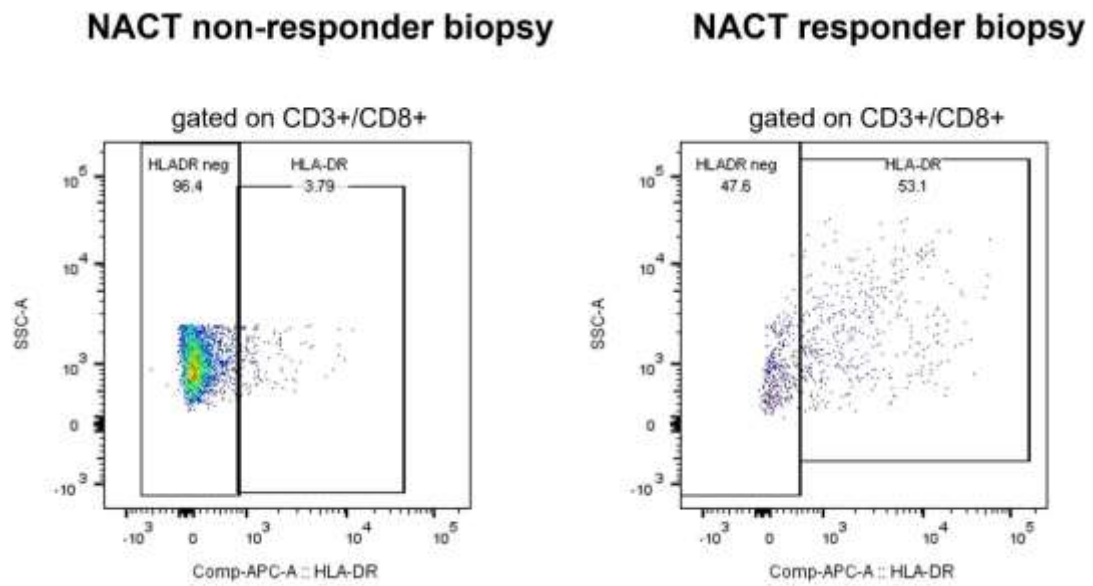

**Figure S2.** Flow cytometry dot plot of HLA-DR gated inside CD3+/CD8+ in biopsies of NACT non-responders and NACT-responders.

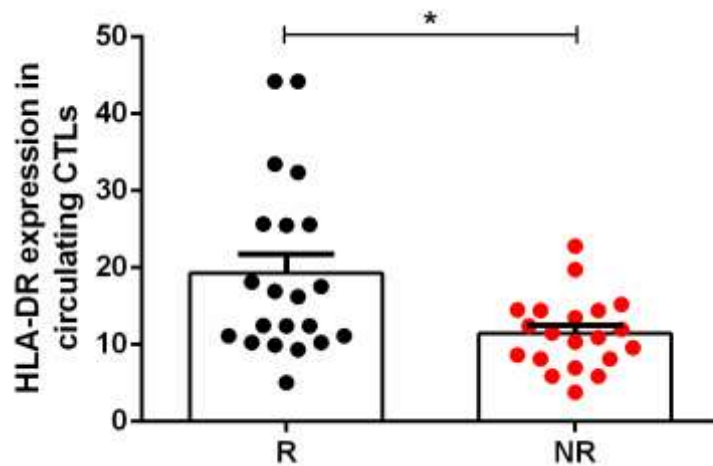

**Figure S3.** HLA-DR expression level in systemic cytotoxic T cells segregate breast cancer patients according to their response to neoadjuvant chemotherapy. HLA-DR expression level in circulating cytotoxic T lymphocytes (CTLs) of NACT-responders (R, black dots,  $n = 21$ ) and NACT non-responders (NR, red dots,  $n = 20$ ).  $*p < 0.05$ .

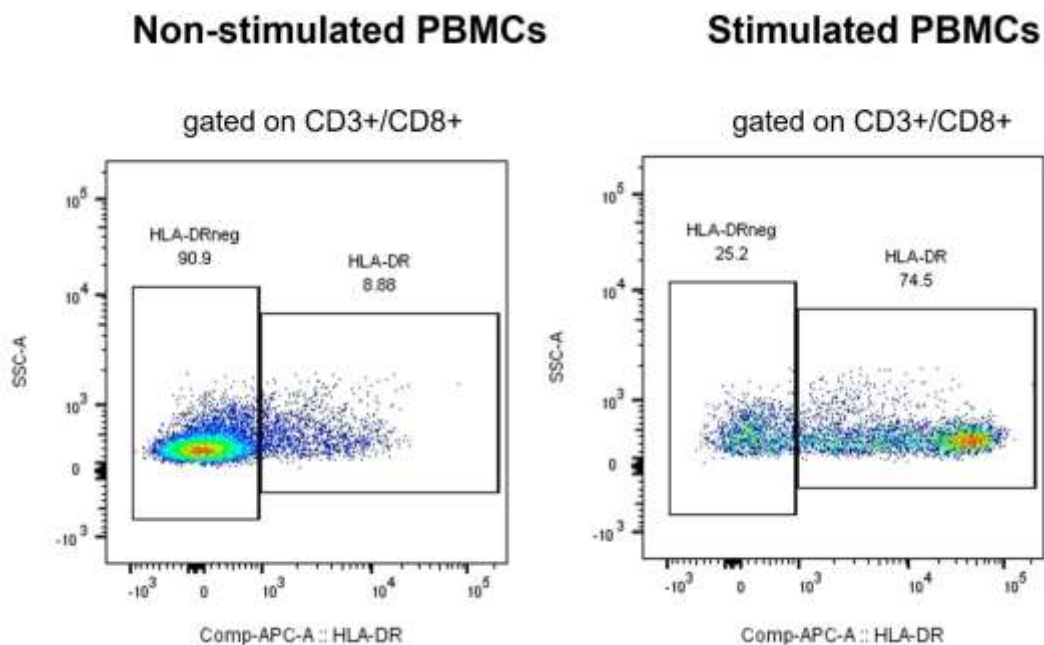

**Figure S4.** Flow cytometry dot plot of HLA-DR gated inside CD3+/CD8+ in PBMCs isolated from breast cancer patients with or without previous PMA/ionomycin stimulation.

**Table S1. Univariate analysis for the biomarker HLA-DR level in CTLs.** HLA-DR expression level in CTLs and other immunological markers and clinical parameters were analyzed by univariate analysis. *p*-value, odds ratio and the confidence interval of the odds ratio are represented.

| Parameter                                           | <i>p</i> -value | Odds Ratio | 95% Confidence Interval |
|-----------------------------------------------------|-----------------|------------|-------------------------|
| HLA-DR expression level in CTLs                     | <0.0001         | 1.965      | 1.35–2.86               |
| Immune cells (CD45)                                 | 0.985           | 1.000      | 0.965–1.036             |
| T cells (CD3)                                       | 0.520           | 0.985      | 0.94–1.032              |
| B cells (CD19)                                      | 0.919           | 0.995      | 0.904–1.095             |
| NK cells (CD161)                                    | 0.122           | 0.852      | 0.696–1.044             |
| T helper cells (CD4)                                | 0.282           | 0.972      | 0.922–1.024             |
| CTLs (CD8)                                          | 0.934           | 1.006      | 0.875–1.156             |
| Tregs (CD25 <sup>high</sup> /CD127 <sup>low</sup> ) | 0.503           | 1.157      | 0.755–1.772             |
| M1 macrophages (CD11b+/CD163-/CD206-)               | 0.719           | 0.628      | 0.05–7.944              |
| M2 macrophages (CD11b+/CD163+/CD206+)               | 0.743           | 0.939      | 0.644–1.369             |
| Neutrophils (CD15)                                  | 0.298           | 0.897      | 0.731–1.101             |
| HLA-DR expression level in Tregs                    | 0.724           | 0.981      | 0.885–1.089             |
| PD-L1                                               | 0.165           | 1.015      | 0.994–1.037             |
| IL-10                                               | 0.107           | 1.051      | 1–1.104                 |
| Age                                                 | 0.254           | 0.975      | 0.933–1.018             |
| Body Mass Index                                     | 0.69            | 0.977      | 0.869–1.097             |
| Tumor dimension                                     | 0.167           | 1.024      | 0.99–1.06               |
| Node invasion status                                | 0.338           | 0.566      | 0.177–1.813             |
| Ki67 (%)                                            | 0.271           | 1.012      | 0.991–1.033             |
| Grade                                               | 0.474           | 0.563      | 0.116–2.718             |
